# Supplementary material
Source: PubMed Central journal article supplement (PMC3725104)
Supplement: 1310430110_pnas.201310430SI.pdf [file 1310430110_pnas.201310430SI.pdf]

# Supporting Information

Nakagawa et al. 10.1073/pnas.1310430110

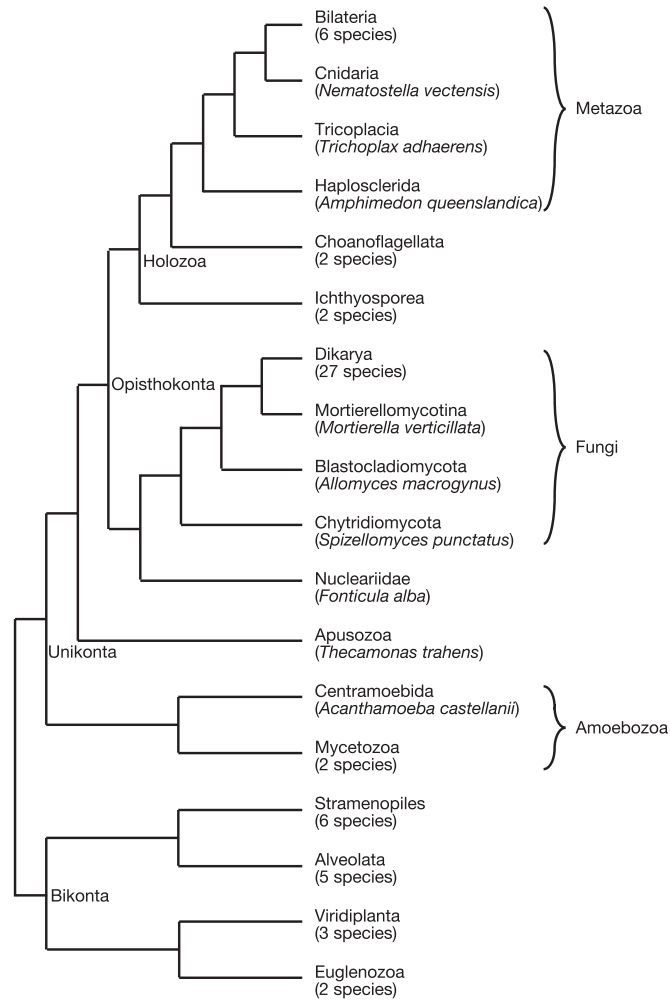

Fig. S1. Phylogeny of species used in this study.

(A) 0.8

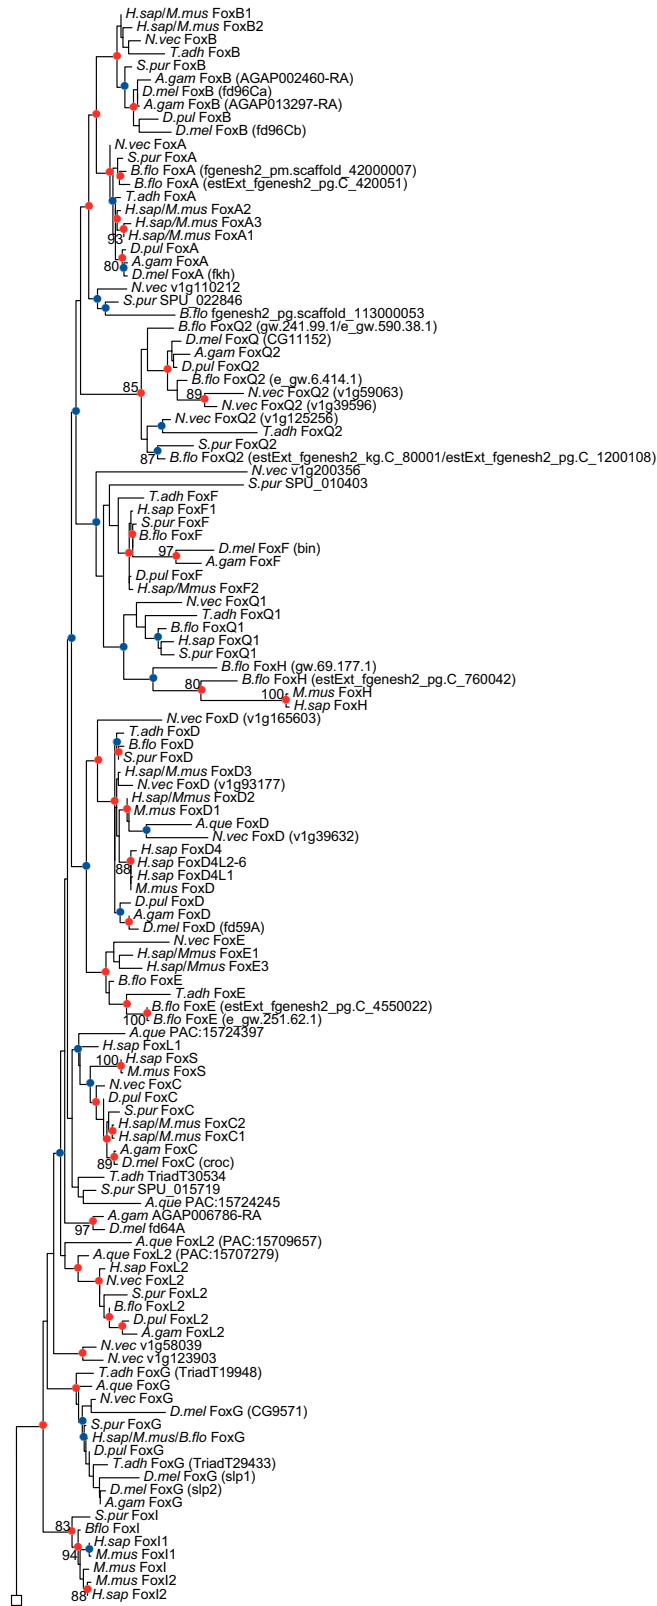

Fig. S2. (Continued)

(B)

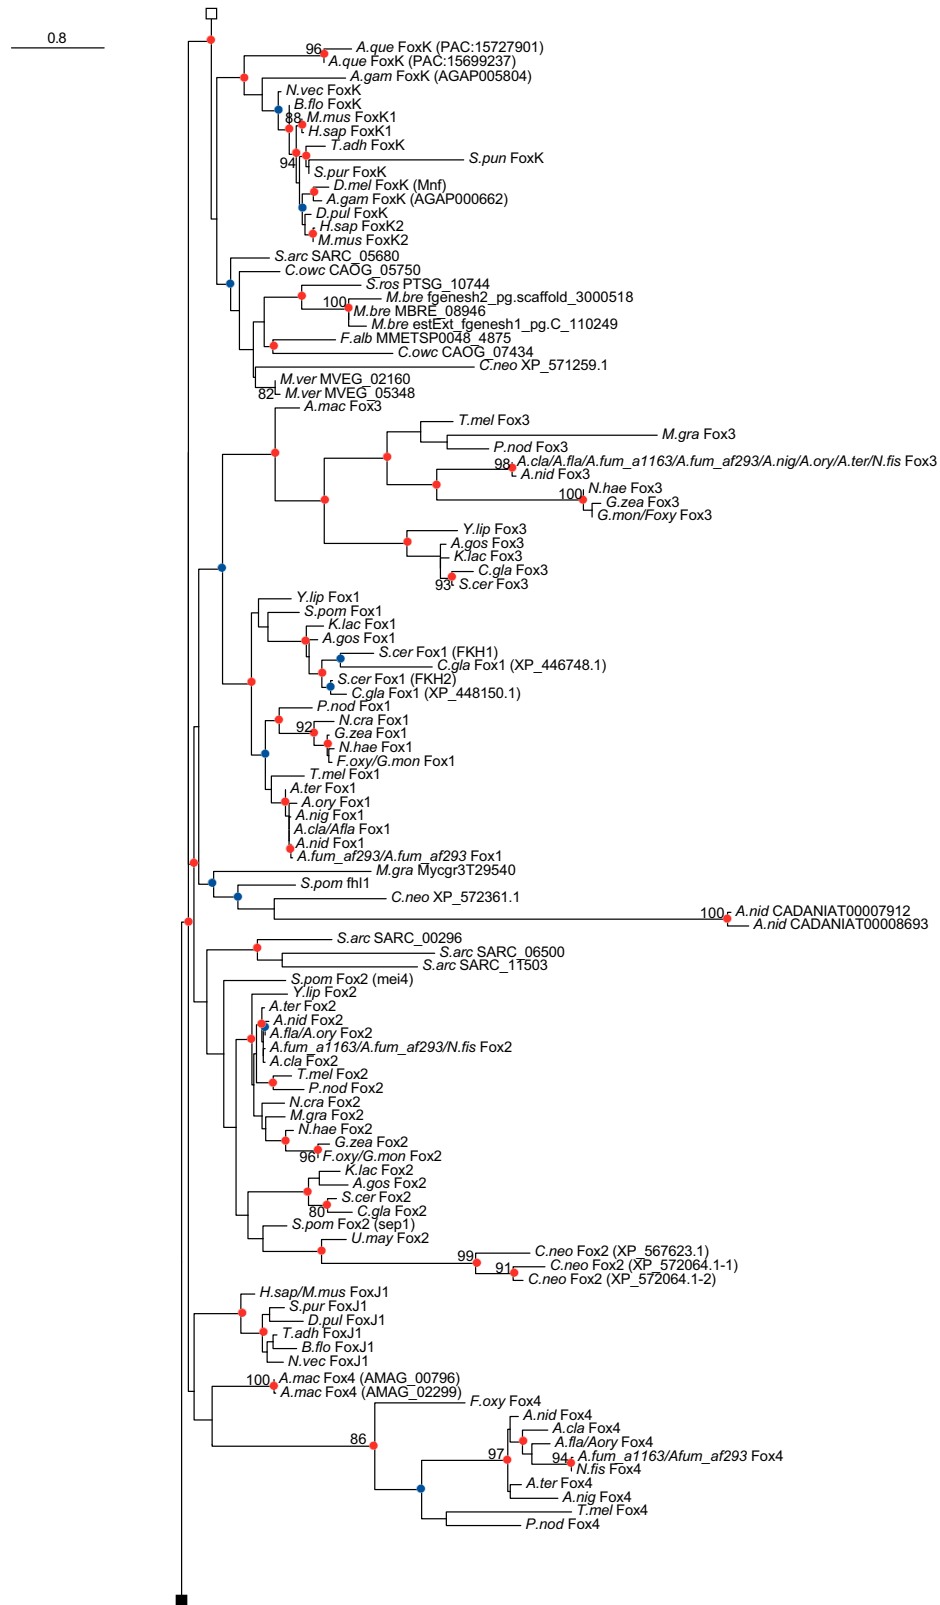

Fig. S2. (Continued)

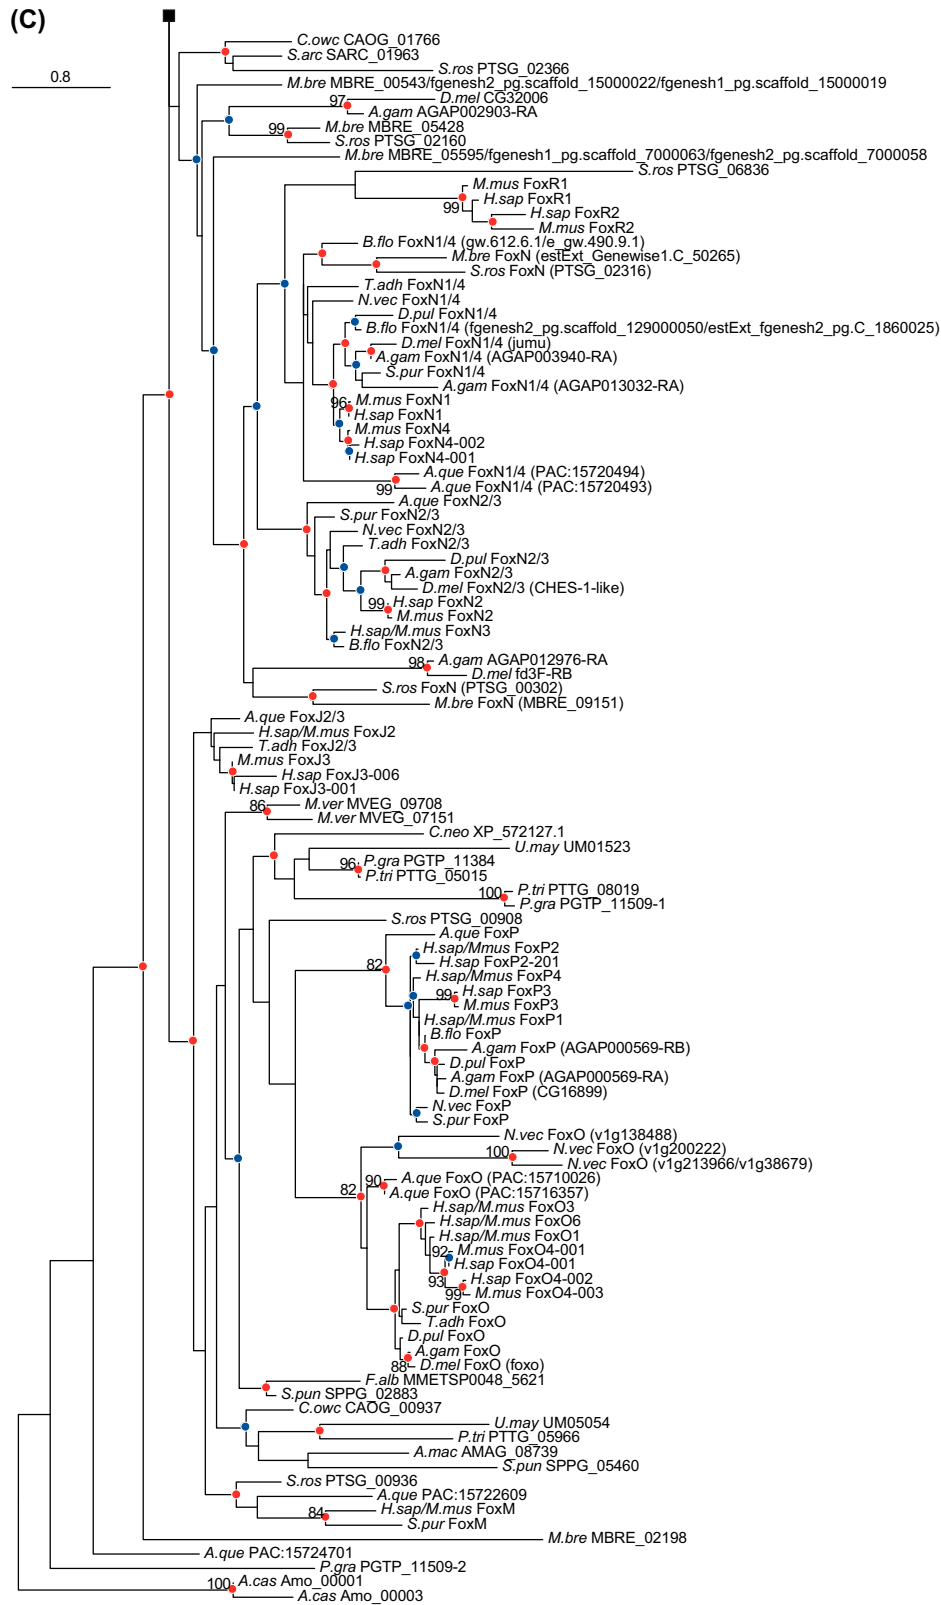

Fig. S2. Maximum likelihood (ML) phylogenetic tree of forkhead domains. The tree is split into three panels for presentation, due to its size. (A) The open square continues the branch of the tree represented by the open square in B. A corresponds to the metazoan-specific clade I. (B) The black square continues the branch of the tree represented by the black square in C. (C) The root and outgroup of the tree.

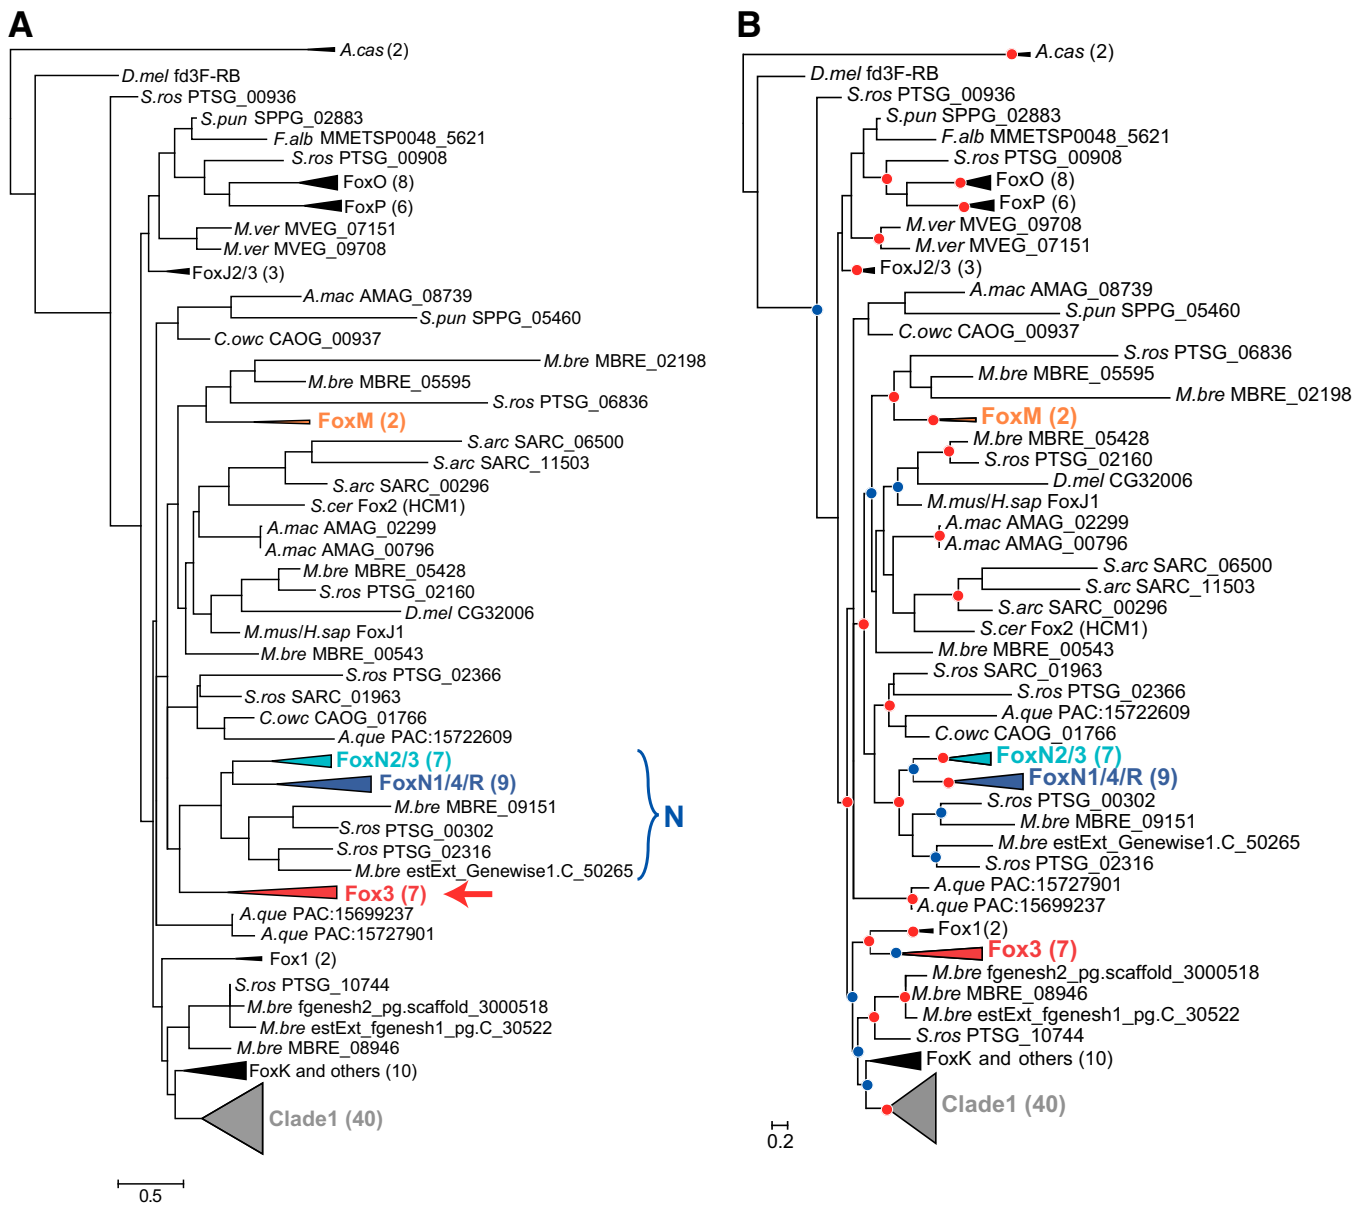

Fig. S3. (Continued)

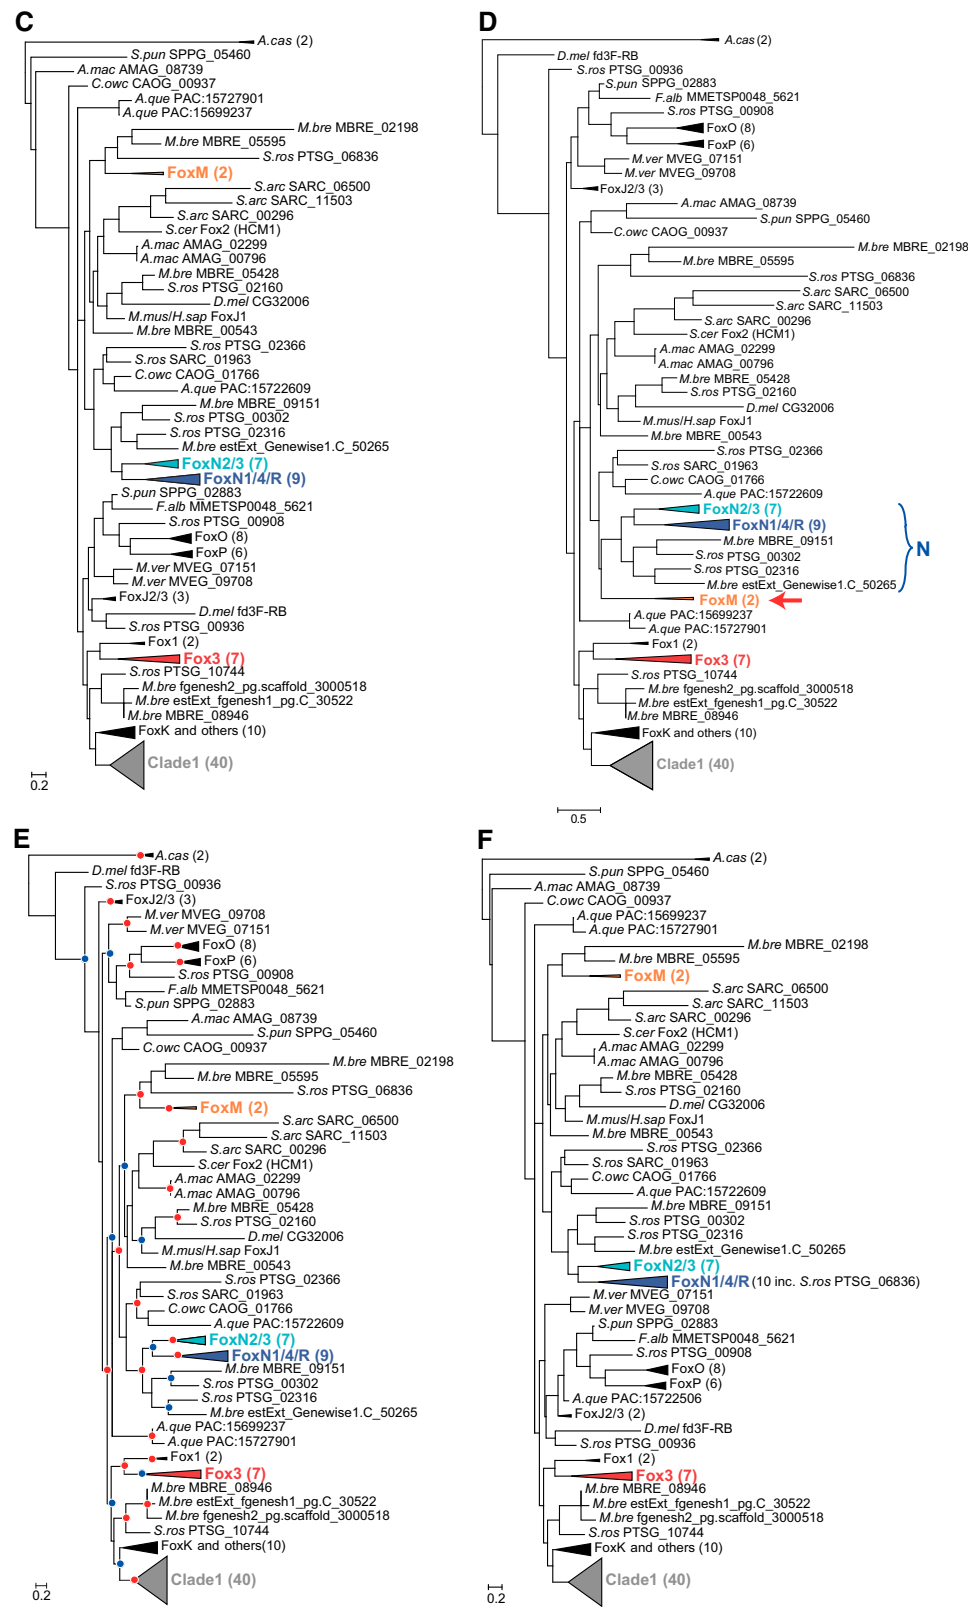

**Fig. S3.** ML phylogenetic trees testing monophyly of forkhead box N (FoxN) with Fox3 (A–C) and with FoxM (D–F). (A) A tree was constructed containing a monophyletic FoxN+3 clade, and then branch lengths were optimized and log likelihood was calculated and compared with the ML tree shown in Fig. 2 (see main text). (B and C) ML optimization of this starting tree with either PhyML (B) or RAxML (C) yielded trees in which each subfamily is more closely related to FkhP<sub>S</sub>-only-binding clades than to each other. (D–F) Similarly, a starting tree was constructed containing a monophyletic FoxN+M clade (D) and ML optimized with PhyML (E) or RAxML (F).

| Protein Name                     | Primary Motif                                                                       | Secondary Motif                                                                      | Other published motifs, source |
|----------------------------------|-------------------------------------------------------------------------------------|--------------------------------------------------------------------------------------|--------------------------------|
| <i>A. cas</i> Fox                | 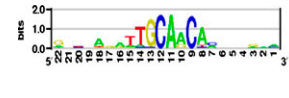   |    |                                |
| <i>A. mac</i> Fox3               |    |    |                                |
| <i>A. mac</i> Fox4               |    |    |                                |
| <i>A. gos</i> Fox3               |    |    |                                |
| <i>A. nid</i> Fox3               |    |    |                                |
| <i>A. nid</i> Fox4               |   |   |                                |
| <i>D. mel</i> jumu (N1/4)        |  |  |                                |
| <i>D. mel</i> CHES-1-like (N2/3) |  |  |                                |
| <i>H. sap</i> FoxN2              |  |  |                                |

Fig. S4. (Continued)

| Protein Name             | Primary Motif                                                                       | Secondary Motif                                                                      | Other published motifs, source                                                               |
|--------------------------|-------------------------------------------------------------------------------------|--------------------------------------------------------------------------------------|----------------------------------------------------------------------------------------------|
| <i>H. sap</i><br>FoxN4   | 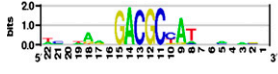   |    |                                                                                              |
| <i>H. sap</i> FoxR1      |    |    |                                                                                              |
| <i>K. lac</i> Fox3       |    |    |                                                                                              |
| <i>M. bre</i><br>FoxN1/4 |    |    |                                                                                              |
| <i>M. mus</i><br>FoxA2   |    |    | <br>(1)   |
| <i>M. mus</i><br>FoxJ1   |   |   |                                                                                              |
| <i>M. mus</i><br>FoxJ3   |  |  | <br>(2) |
| <i>M. mus</i><br>FoxJ3   |                                                                                     |                                                                                      | <br>(2) |
| <i>M. mus</i><br>FoxJ3   |                                                                                     |                                                                                      | <br>(2) |

Fig. S4. (Continued)



| Protein Name             | Primary Motif                                                                       | Secondary Motif                                                                      | Other published motifs, source                                                             |
|--------------------------|-------------------------------------------------------------------------------------|--------------------------------------------------------------------------------------|--------------------------------------------------------------------------------------------|
| <i>M. mus</i><br>FoxJ3   |                                                                                     |                                                                                      | <br>(2) |
| <i>M. mus</i><br>FoxK1   |    |    | <br>(2) |
|                          |                                                                                     |                                                                                      | <br>(2) |
| <i>M. mus</i><br>FoxL1   |    |    |                                                                                            |
| <i>M. mus</i><br>FoxN1   |    |    | <br>(3) |
| <i>M. mus</i><br>FoxN4   |   |   |                                                                                            |
| <i>M. mus</i><br>FoxM1   |  |  |                                                                                            |
| <i>M. gra</i> Fox3       |  |  |                                                                                            |
| <i>N. vec</i><br>FoxN2/3 |  |  |                                                                                            |

Fig. S4. (Continued)

| Protein Name                | Primary Motif                                                                       | Secondary Motif                                                                      | Other published motifs, source |
|-----------------------------|-------------------------------------------------------------------------------------|--------------------------------------------------------------------------------------|--------------------------------|
| <i>S. cer</i><br>Fox1,Fkh1  |    |    |                                |
| <i>S. cer</i><br>Fox1,Fkh2  |    |    |                                |
| <i>S. cer</i> Fox3,<br>Fhl1 |    |    |                                |
| <i>S. cer</i> Fox2,<br>Hcm1 |    |    |                                |
| <i>S. pur</i> FoxM          |    |    |                                |
| <i>T. adh</i><br>FoxN2/3    |   |   |                                |
| <i>T. mel</i> Fox3          |  |  |                                |

Fig. S4. Primary and secondary protein-binding microarray (PBM)-derived DNA-binding site motifs for Forkhead proteins.

1. Tuteja G, White P, Schug J, Kaestner KH (2009) Extracting transcription factor targets from ChIP-Seq data. *Nucleic Acids Res* 37(17):e113.
2. Jolma A, et al. (2013) DNA-binding specificities of human transcription factors. *Cell* 152(1-2):327–339.
3. Schlake T, Schorpp M, Nehls M, Boehm T (1997) The nude gene encodes a sequence-specific DNA binding protein with homologs in organisms that lack an anticipatory immune system. *Proc Natl Acad Sci USA* 94(8):3842–3847.

**Dataset S1.** Fox domains and species used in full and representative ML analyses.

[Dataset S1](#)

**Dataset S2.** PBM experimental details. RefSeq and UniProt IDs are provided, if applicable.

[Dataset S2](#)

**Dataset S3.** PBM 8-mer enrichment (E) scores. Ungapped 8-mer E scores for all forkhead proteins considered in this study.

[Datasets S3](#)

Dataset S4. PBM-derived position weight matrices (PWMs) for primary and secondary motifs for each forkhead protein.

[Datasets S4](#)
